# Supplementary material for: Bacterial microbiome of the chigger mite Leptotrombidium imphalum varies by life stage and infection with the scrub typhus pathogen Orientia tsutsugamushi
Source: PLoS One. 2018 Dec 6;13(12):e0208327. doi: 10.1371/journal.pone.0208327 (PMC6283546; doi:10.1371/journal.pone.0208327)
Supplement: S1 File — (XLSX) [file pone.0208327.s011.xlsx]

## Sheet: Chigger_UNC21_0366_000000000-AW
#SampleID	BarcodeSequence	LinkerPrimerSequence	ReversePrimer	Description
LiMP01	TAAGGCGGCGTAAG	CCTACGGGNGGCWGCAG	GACTACHVGGGTATCTAATCC	Uninfected Li colony Male
LiMP02	TAAGGCGCTCTCTA	CCTACGGGNGGCWGCAG	GACTACHVGGGTATCTAATCC	Uninfected Li colony Male
LiMP03	TAAGGCGTATCCTC	CCTACGGGNGGCWGCAG	GACTACHVGGGTATCTAATCC	Uninfected Li colony Male
LiMP04	TAAGGCGAGAGTAG	CCTACGGGNGGCWGCAG	GACTACHVGGGTATCTAATCC	Uninfected Li colony Male
LiMP05	TAAGGCGGTAAGGA	CCTACGGGNGGCWGCAG	GACTACHVGGGTATCTAATCC	Uninfected Li colony Male
LiMP06	TAAGGCGACTGCAT	CCTACGGGNGGCWGCAG	GACTACHVGGGTATCTAATCC	Uninfected Li colony Male
LiFP01	TAAGGCGAAGGAGT	CCTACGGGNGGCWGCAG	GACTACHVGGGTATCTAATCC	Uninfected Li colony Female
LiFP02	TAAGGCGCTAAGCC	CCTACGGGNGGCWGCAG	GACTACHVGGGTATCTAATCC	Uninfected Li colony Female
LiFP03	CGTACTAGCGTAAG	CCTACGGGNGGCWGCAG	GACTACHVGGGTATCTAATCC	Uninfected Li colony Female
LiFP04	CGTACTACTCTCTA	CCTACGGGNGGCWGCAG	GACTACHVGGGTATCTAATCC	Uninfected Li colony Female
LiFP05	CGTACTATATCCTC	CCTACGGGNGGCWGCAG	GACTACHVGGGTATCTAATCC	Uninfected Li colony Female
LiFP06	CGTACTAAGAGTAG	CCTACGGGNGGCWGCAG	GACTACHVGGGTATCTAATCC	Uninfected Li colony Female
LiDP01	GTAGAGGGTAAGGA	CCTACGGGNGGCWGCAG	GACTACHVGGGTATCTAATCC	Uninfected Li colony deutonymphs
LiDP02	GTAGAGGACTGCAT	CCTACGGGNGGCWGCAG	GACTACHVGGGTATCTAATCC	Uninfected Li colony deutonymphs
LiDP03	GTAGAGGAAGGAGT	CCTACGGGNGGCWGCAG	GACTACHVGGGTATCTAATCC	Uninfected Li colony deutonymphs
LiDP04	GTAGAGGCTAAGCC	CCTACGGGNGGCWGCAG	GACTACHVGGGTATCTAATCC	Uninfected Li colony deutonymphs
LiDP05	GTAGAGGGCGTAAG	CCTACGGGNGGCWGCAG	GACTACHVGGGTATCTAATCC	Uninfected Li colony deutonymphs
LiDP06	GTAGAGGCTCTCTA	CCTACGGGNGGCWGCAG	GACTACHVGGGTATCTAATCC	Uninfected Li colony deutonymphs
LiLP01	GTAGAGGTATCCTC	CCTACGGGNGGCWGCAG	GACTACHVGGGTATCTAATCC	Uninfected Li colony larvae
LiLP02	GTAGAGGAGAGTAG	CCTACGGGNGGCWGCAG	GACTACHVGGGTATCTAATCC	Uninfected Li colony larvae
LiLP03	CGAGGCTGTAAGGA	CCTACGGGNGGCWGCAG	GACTACHVGGGTATCTAATCC	Uninfected Li colony larvae
LiLP04	CGAGGCTACTGCAT	CCTACGGGNGGCWGCAG	GACTACHVGGGTATCTAATCC	Uninfected Li colony larvae
LiLP05	CGAGGCTAAGGAGT	CCTACGGGNGGCWGCAG	GACTACHVGGGTATCTAATCC	Uninfected Li colony larvae
LiLP06	CGAGGCTCTAAGCC	CCTACGGGNGGCWGCAG	GACTACHVGGGTATCTAATCC	Uninfected Li colony larvae
LiLP07	TCCTGAGGCGTAAG	CCTACGGGNGGCWGCAG	GACTACHVGGGTATCTAATCC	Uninfected Li colony larvae
ILiMP01	TCCTGAGCTCTCTA	CCTACGGGNGGCWGCAG	GACTACHVGGGTATCTAATCC	Infected Li colony Male
ILiMP02	TCCTGAGTATCCTC	CCTACGGGNGGCWGCAG	GACTACHVGGGTATCTAATCC	Infected Li colony Male
ILiMP03	TCCTGAGAGAGTAG	CCTACGGGNGGCWGCAG	GACTACHVGGGTATCTAATCC	Infected Li colony Male
ILiMP04	TCCTGAGGTAAGGA	CCTACGGGNGGCWGCAG	GACTACHVGGGTATCTAATCC	Infected Li colony Male
ILiMP05	TCCTGAGACTGCAT	CCTACGGGNGGCWGCAG	GACTACHVGGGTATCTAATCC	Infected Li colony Male
ILiMP06	TCCTGAGAAGGAGT	CCTACGGGNGGCWGCAG	GACTACHVGGGTATCTAATCC	Infected Li colony Male pcr neg
ILiMP07	TCCTGAGCTAAGCC	CCTACGGGNGGCWGCAG	GACTACHVGGGTATCTAATCC	Infected Li colony Male pcr neg
ILiMP08	GGACTCCGCGTAAG	CCTACGGGNGGCWGCAG	GACTACHVGGGTATCTAATCC	Infected Li colony Male pcr neg
ILiMP09	GGACTCCCTCTCTA	CCTACGGGNGGCWGCAG	GACTACHVGGGTATCTAATCC	Infected Li colony Male pcr neg
ILiFP01	GGACTCCTATCCTC	CCTACGGGNGGCWGCAG	GACTACHVGGGTATCTAATCC	Infected Li colony Female
ILiFP02	GGACTCCAGAGTAG	CCTACGGGNGGCWGCAG	GACTACHVGGGTATCTAATCC	Infected Li colony Female
ILiFP03	GGACTCCGTAAGGA	CCTACGGGNGGCWGCAG	GACTACHVGGGTATCTAATCC	Infected Li colony Female
ILiFP04	GGACTCCACTGCAT	CCTACGGGNGGCWGCAG	GACTACHVGGGTATCTAATCC	Infected Li colony Female
ILiFP05	GGACTCCAAGGAGT	CCTACGGGNGGCWGCAG	GACTACHVGGGTATCTAATCC	Infected Li colony Female
ILiFP06	GGACTCCCTAAGCC	CCTACGGGNGGCWGCAG	GACTACHVGGGTATCTAATCC	Infected Li colony Female
ILiFP07	TAGGCATGCGTAAG	CCTACGGGNGGCWGCAG	GACTACHVGGGTATCTAATCC	Infected Li colony Female
ILiFP08	TAGGCATCTCTCTA	CCTACGGGNGGCWGCAG	GACTACHVGGGTATCTAATCC	Infected Li colony Female
ILiDP01	TAGGCATAGAGTAG	CCTACGGGNGGCWGCAG	GACTACHVGGGTATCTAATCC	Infected Li colony deutonymphs
ILiDP02	TAGGCATGTAAGGA	CCTACGGGNGGCWGCAG	GACTACHVGGGTATCTAATCC	Infected Li colony deutonymphs
ILiDP03	TAGGCATACTGCAT	CCTACGGGNGGCWGCAG	GACTACHVGGGTATCTAATCC	Infected Li colony deutonymphs
ILiDP04	TAGGCATAAGGAGT	CCTACGGGNGGCWGCAG	GACTACHVGGGTATCTAATCC	Infected Li colony deutonymphs
ILiDP05	TAGGCATCTAAGCC	CCTACGGGNGGCWGCAG	GACTACHVGGGTATCTAATCC	Infected Li colony deutonymphs
ILiDP06	CTCTCTAGCGTAAG	CCTACGGGNGGCWGCAG	GACTACHVGGGTATCTAATCC	Infected Li colony deutonymphs
ILiDP07	CTCTCTACTCTCTA	CCTACGGGNGGCWGCAG	GACTACHVGGGTATCTAATCC	Infected Li colony deutonymphs
ILiLP01	CTCTCTATATCCTC	CCTACGGGNGGCWGCAG	GACTACHVGGGTATCTAATCC	Infected Li colony Larvae
ILiLP02	CTCTCTAAGAGTAG	CCTACGGGNGGCWGCAG	GACTACHVGGGTATCTAATCC	Infected Li colony Larvae
ILiLP03	CTCTCTAGTAAGGA	CCTACGGGNGGCWGCAG	GACTACHVGGGTATCTAATCC	Infected Li colony Larvae
ILiLP04	CTCTCTAACTGCAT	CCTACGGGNGGCWGCAG	GACTACHVGGGTATCTAATCC	Infected Li colony Larvae
ILiLP05	CTCTCTAAAGGAGT	CCTACGGGNGGCWGCAG	GACTACHVGGGTATCTAATCC	Infected Li colony Larvae
ILiLP06	CTCTCTACTAAGCC	CCTACGGGNGGCWGCAG	GACTACHVGGGTATCTAATCC	Infected Li colony Larvae
ILiLP07	CAGAGAGGCGTAAG	CCTACGGGNGGCWGCAG	GACTACHVGGGTATCTAATCC	Infected Li colony Larvae pcr neg
ILiLP08	CAGAGAGCTCTCTA	CCTACGGGNGGCWGCAG	GACTACHVGGGTATCTAATCC	Infected Li colony Larvae pcr neg
CEP01	CAGAGAGTATCCTC	CCTACGGGNGGCWGCAG	GACTACHVGGGTATCTAATCC	Collembolan eggs
CEP02	CAGAGAGAGAGTAG	CCTACGGGNGGCWGCAG	GACTACHVGGGTATCTAATCC	Collembolan eggs
CEP03	CAGAGAGGTAAGGA	CCTACGGGNGGCWGCAG	GACTACHVGGGTATCTAATCC	Collembolan eggs
CEP04	CAGAGAGACTGCAT	CCTACGGGNGGCWGCAG	GACTACHVGGGTATCTAATCC	Collembolan eggs
CEP05	CAGAGAGAAGGAGT	CCTACGGGNGGCWGCAG	GACTACHVGGGTATCTAATCC	Collembolan eggs
CEP06	CAGAGAGCTAAGCC	CCTACGGGNGGCWGCAG	GACTACHVGGGTATCTAATCC	Collembolan eggs
CEP07	GCTACGCGCGTAAG	CCTACGGGNGGCWGCAG	GACTACHVGGGTATCTAATCC	Collembolan eggs
CEP08	GCTACGCCTCTCTA	CCTACGGGNGGCWGCAG	GACTACHVGGGTATCTAATCC	Collembolan eggs
